# Supplementary material for: The Catalytic Domain Mediates Homomultimerization of MT1-MMP and the Prodomain Interferes with MT1-MMP Oligomeric Complex Assembly
Source: MDPI journal article supplement (doi:10.3390/biom12081145), 2022-08-19
Supplement: s1 [file s1]

**Table S1.** Primers used in the cloning process.

| Primer name                     | Primer sequence                                                                                            |
|---------------------------------|------------------------------------------------------------------------------------------------------------|
| MT1_F_BIP                       | 5'-GTTAGCGCATAGGGTACCATGAAGTTATGCATATTACTGGCCGT<br>CGTGGCCTTTGTTGGCCTCTCGCTCGGGGCGCTCGCCTCCCTCGGCTCG-3'    |
| pAC_MT1-<br>MMP_His_<br>Strep_R | 5'-GTAGCGGATATGGCGGCCGCTCATTATTTTCGAACTGCGGGT<br>GGCTCCAATGGTGATGGTGATGGTGGGCAGCCGCGCTCACCGCCCC-3'         |
| pAc_Bip_Hpx_L<br>_F             | 5'-CACCCGAGCCGAGGTACCATGAAGTTATGCATATTACTGGCCGT<br>CGTGGCCTTTGTTGGCCTCTCGCTCGGAGGGGGTGAGTCAGGGTTCCCCACC-3' |
| pAc_Hpx_Strep<br>_R             | 5'-GTAGCGGATATGGCGGCCGCTCATTATTTTCGAACTGCGGGT<br>GGCTCCAGCAGCCCATCCAGTCCCTCAG-3'                           |
| MT1_R111A_F                     | 5'-GCTGAGATCAAGGCCAATGTTTCGAAGGAAGGCTTACGCCATCC<br>AGGGTCTCAAATGG-3'                                       |
| MT1_R111A_R                     | 5'-CCATTTGAGACCCTGGATGGCGTAAGCCTTCCTTCGAACATTGG<br>CCTTGATCTCAGC-3'                                        |
| MT1_R89A_F                      | 5'-GATGCAGACACCATGAAGGCCATGGCCCGCCCCCGATGTGGTGTTCAG<br>AC-3'                                               |
| MT1_R89A_R                      | 5'-GTCTGGAACACCACATCGGGGGCGGGCCATGGCCTTCATGGTGTCTGCA<br>TC-3'                                              |
| pAC_Cat_L_His<br>_Strep_R       | 5'-AACCTGGTCTTGGCGGCCGCTATTATTTTCGAACTGCGGGTGGCTCCA<br>GTGATGGTGATGGTGATGCCCATAGGTGGGGTTTTTGGG-3'          |
| Furin_D_MT1_F                   | 5'-GCTGAGATCAAGGCCAATGTTGCTGCCGCAGCGTACGCCATCCAGGGTCT<br>CAAATGG-3'                                        |
| Furin_D_MT1_R                   | 5'-CCATTTGAGACCCTGGATGGCGTACGCTGCGGCAGCAACATTGGCCTTGA<br>TCTCAGC-3'                                        |
